# Supplementary material for: Estimation of hourly land surface heat fluxes over the Tibetan Plateau by the combined use of geostationary and polar-orbiting satellites
Source: Copernicus journal article supplement (doi:10.5194/acp-19-5529-2019), 2019-04-26
Supplement: Supplementary file 1 [file acp-19-5529-2019-supplement.pdf]

Supplement of Atmos. Chem. Phys., 19, 5529–5541, 2019  
<https://doi.org/10.5194/acp-19-5529-2019-supplement>  
© Author(s) 2019. This work is distributed under  
the Creative Commons Attribution 4.0 License.

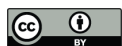

*Supplement of*

## **Estimation of hourly land surface heat fluxes over the Tibetan Plateau by the combined use of geostationary and polar-orbiting satellites**

**Lei Zhong et al.**

*Correspondence to:* Lei Zhong (zhonglei@ustc.edu.cn)

The copyright of individual parts of the supplement might differ from the CC BY 4.0 License.

## Supplement

According to the characteristics of the SVISSR sensor onboard the FY-2C, the SWA modified by Hu et al. (2018) is utilized, and the  $T_s$  can be derived as:

$$T_s = a_0 + a_1w + [a_2 + (a_3 + a_4w\cos\theta)(1 - \varepsilon_s) - (a_5 + a_6w)\Delta\varepsilon] \frac{T_i+T_j}{2} + [a_7 + a_8w + (a_9 + a_{10}w)(1 - \varepsilon_s) - (a_{11} + a_{12}w)\Delta\varepsilon] \frac{T_i-T_j}{2}, \quad (S1)$$

with  $\varepsilon_s = (\varepsilon_i + \varepsilon_j)/2$  and  $\Delta\varepsilon = \varepsilon_i - \varepsilon_j$ , where  $T_i$  and  $T_j$  are the brightness temperature (BT) surveyed in channel  $i$  and  $j$  centered at 11.0  $\mu\text{m}$  and 12.0  $\mu\text{m}$ , respectively;  $\varepsilon_i$  and  $\varepsilon_j$  are the land surface emissivities (LSEs) of channel  $i$  and channel  $j$ , respectively;  $\varepsilon$  is the average emissivity;  $\Delta\varepsilon$  the emissivity difference of channel  $i$  and  $j$ ;  $w$  is the atmosphere WVC;  $\theta$  is the viewing zenith angle (VZA); and  $a_0$ - $a_{12}$  are the model coefficients.

The LSEs of channels 1 and 2 of the FY-2C can be replaced by the LSEs of bands 31 and 32 of MOD11C1 V41 product.

$$\varepsilon_{FIR1} = -0.0611 + 1.0614\varepsilon_{31}, \quad (S2)$$

$$\varepsilon_{FIR2} = -0.0210 + 1.0199\varepsilon_{32}, \quad (S3)$$

where  $\varepsilon_{FIR1}$  and  $\varepsilon_{FIR2}$  are the LSEs of channels FIR1 and FIR2 of the SVISSR, while  $\varepsilon_{32}$  and  $\varepsilon_{31}$  the LSEs of the MODIS bands 32 and 31, respectively.

Brutsaert (1975) proposed a parameterization  $\varepsilon_a$  estimation method based on ground measurements, which is written as follows.

$$\varepsilon_a = \lambda(e_a/T_a)^k \quad (S4)$$

where  $\sigma$  is the Stefan-Boltzmann constant and  $\varepsilon_a$  is the air emissivity. The suggested values of  $\lambda$  and  $k$  from Brutsaert are 1.24 and 1/7, respectively.

The detailed solutions for other variables in Table S1 can be found in Su et al. (2002).

**Table S1: Glossary of variables used in determination of land surface heat fluxes.**

| <b>Symbols</b> | <b>Variable Name</b>                                                     | <b>Units</b>                   |
|----------------|--------------------------------------------------------------------------|--------------------------------|
| $R_n$          | Net radiation flux                                                       | $W \cdot m^{-2}$               |
| $H_s$          | Sensible heat flux                                                       | $W \cdot m^{-2}$               |
| $LE$           | Latent heat flux                                                         | $W \cdot m^{-2}$               |
| $G_0$          | Soil heat flux                                                           | $W \cdot m^{-2}$               |
| $R_{swd}$      | Downwelling solar radiation at the land surface                          | $W \cdot m^{-2}$               |
| $\alpha$       | Broadband albedo                                                         | ----                           |
| $\epsilon_a$   | Surface air emissivity                                                   | ----                           |
| $\epsilon_s$   | Land surface emissivity                                                  | ----                           |
| $\sigma$       | Stefan-Boltzmann constant                                                | $W \cdot m^{-2} \cdot K^{-4}$  |
| $T_a$          | Surface air temperature                                                  | K                              |
| $T_s$          | Land surface temperature                                                 | K                              |
| $\alpha_1$     | Reflectance of blue band                                                 | ----                           |
| $\alpha_2$     | Reflectance of red band                                                  | ----                           |
| $\alpha_3$     | Reflectance of near infrared band                                        | ----                           |
| $\alpha_4$     | Reflectance of short wave infrared band                                  | ----                           |
| $\Gamma_s$     | Ratio of soil heat flux and net radiation flux for bare soil             | ----                           |
| $\Gamma_c$     | Ratio of soil heat flux and net radiation flux for full vegetation cover | ----                           |
| $f_c$          | Vegetation coverage                                                      | ----                           |
| $NDVI$         | Normalized difference vegetation index                                   | ----                           |
| $L$            | Obukhov length                                                           | m                              |
| $c_p$          | Specific heat at constant pressure                                       | $J \cdot kg^{-1} \cdot K^{-1}$ |
| $\theta_v$     | Surface potential virtual air temperature                                | K                              |
| $u_*$          | Friction velocity                                                        | $m \cdot s^{-1}$               |
| $k$            | Von Karman constant                                                      | ----                           |
| $g$            | Acceleration due to gravity                                              | $m \cdot s^{-2}$               |
| $u$            | Mean wind speed at reference height                                      | $m \cdot s^{-1}$               |
| $z$            | Reference height                                                         | m                              |
| $d_0$          | Zero plane displacement height                                           | m                              |
| $z_{0m}$       | Roughness height for momentum transfer                                   | m                              |
| $z_{0h}$       | Roughness height for heat transfer                                       | m                              |
| $\Psi_m$       | Stability correction function for momentum heat transfer                 | ----                           |
| $\Psi_h$       | Stability correction function for sensible heat transfer                 | ----                           |
| $\theta_0$     | Potential temperature at the surface                                     | K                              |
| $\theta_a$     | Potential temperature at reference height                                | K                              |
